# Supplementary material for: Supergene phases from ferruginous duricrusts: non-destructive microsampling and mineralogy prior to (U–Th) ∕ He geochronological analysis
Source: Copernicus journal article supplement (doi:10.5194/ejm-35-383-2023), 2023-06-14
Supplement: Supplementary file 1 [file ejm-35-383-2023-supplement.pdf]

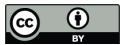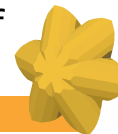

*Supplement of*

**Supergene phases from ferruginous duricrusts:  
non-destructive microsampling and mineralogy prior to  
(U–Th) / He geochronological analysis**

**Karina P. P. Marques et al.**

*Correspondence to:* Karina P. P. Marques ([karina.marques@alumni.usp.br](mailto:karina.marques@alumni.usp.br))

The copyright of individual parts of the supplement might differ from the article licence.

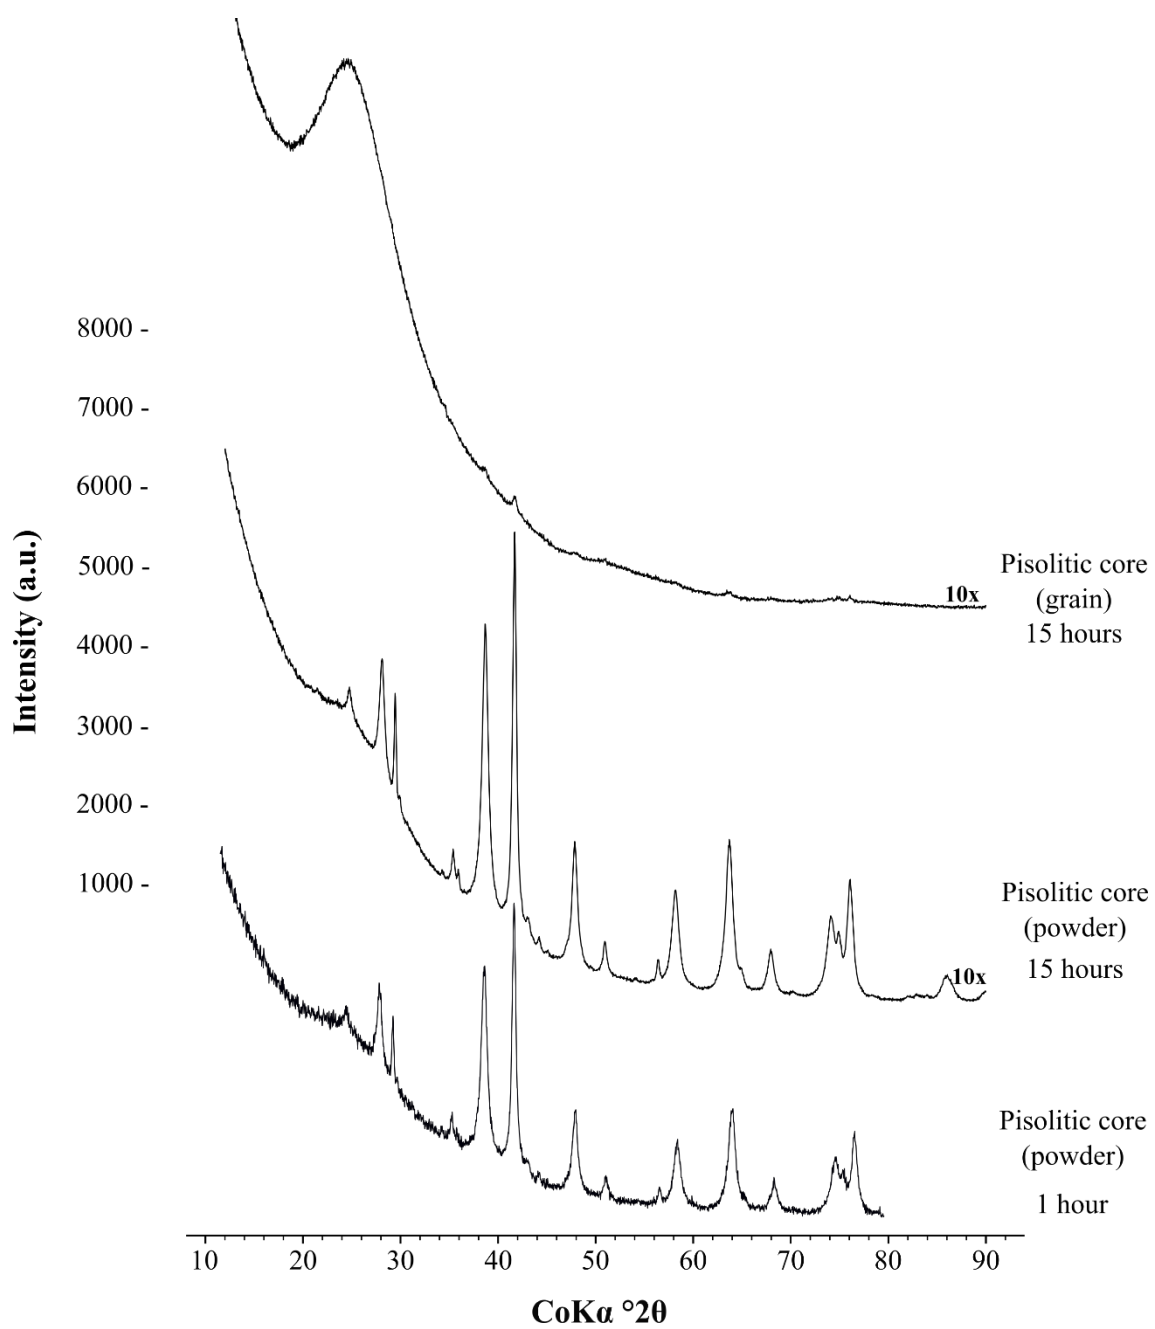

Figure S1: Standard XRD patterns with different exposure times for grain and powder samples loaded in borosilicate capillaries from the pisolitic core of the ferruginous duricrust.

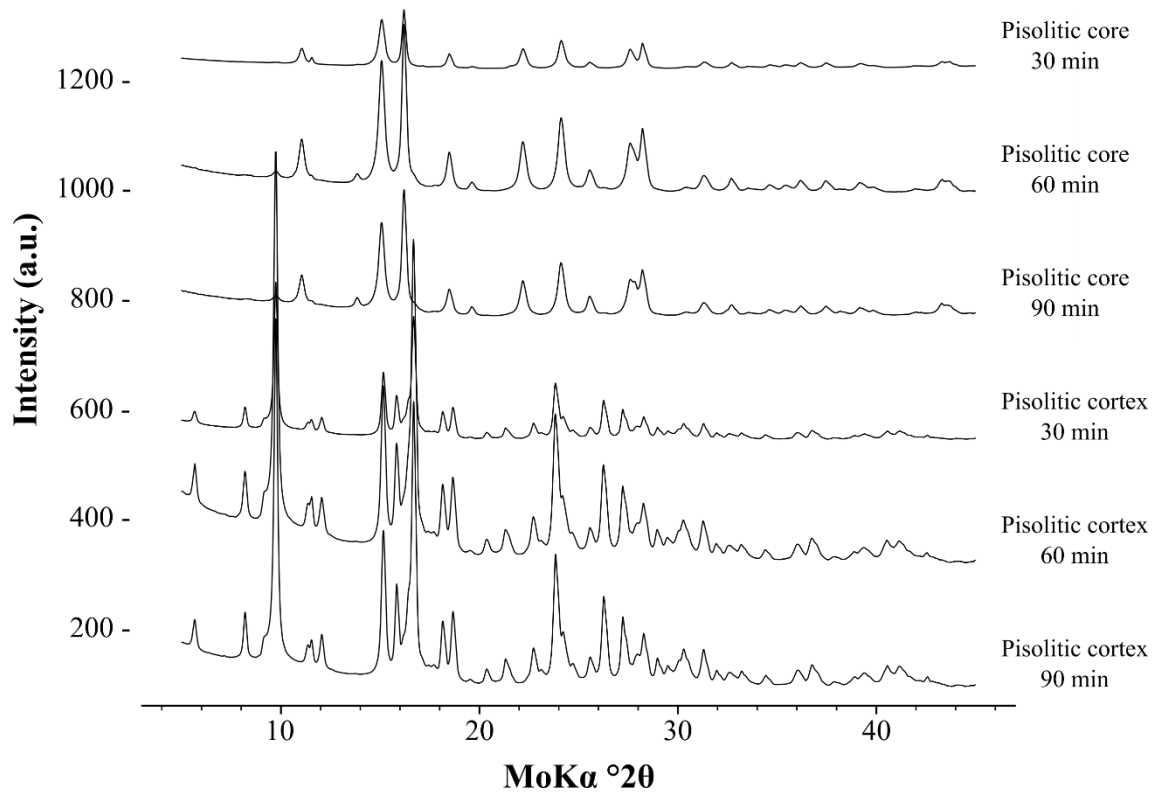

**Figure S2: Rotating anode XRD patterns with different exposure times for grain samples from the pisolitic core and cortex of the ferruginous duricrust.**
